# Supplementary material
Source: PubMed Central journal article supplement (PMC6402800)

# Figure S1

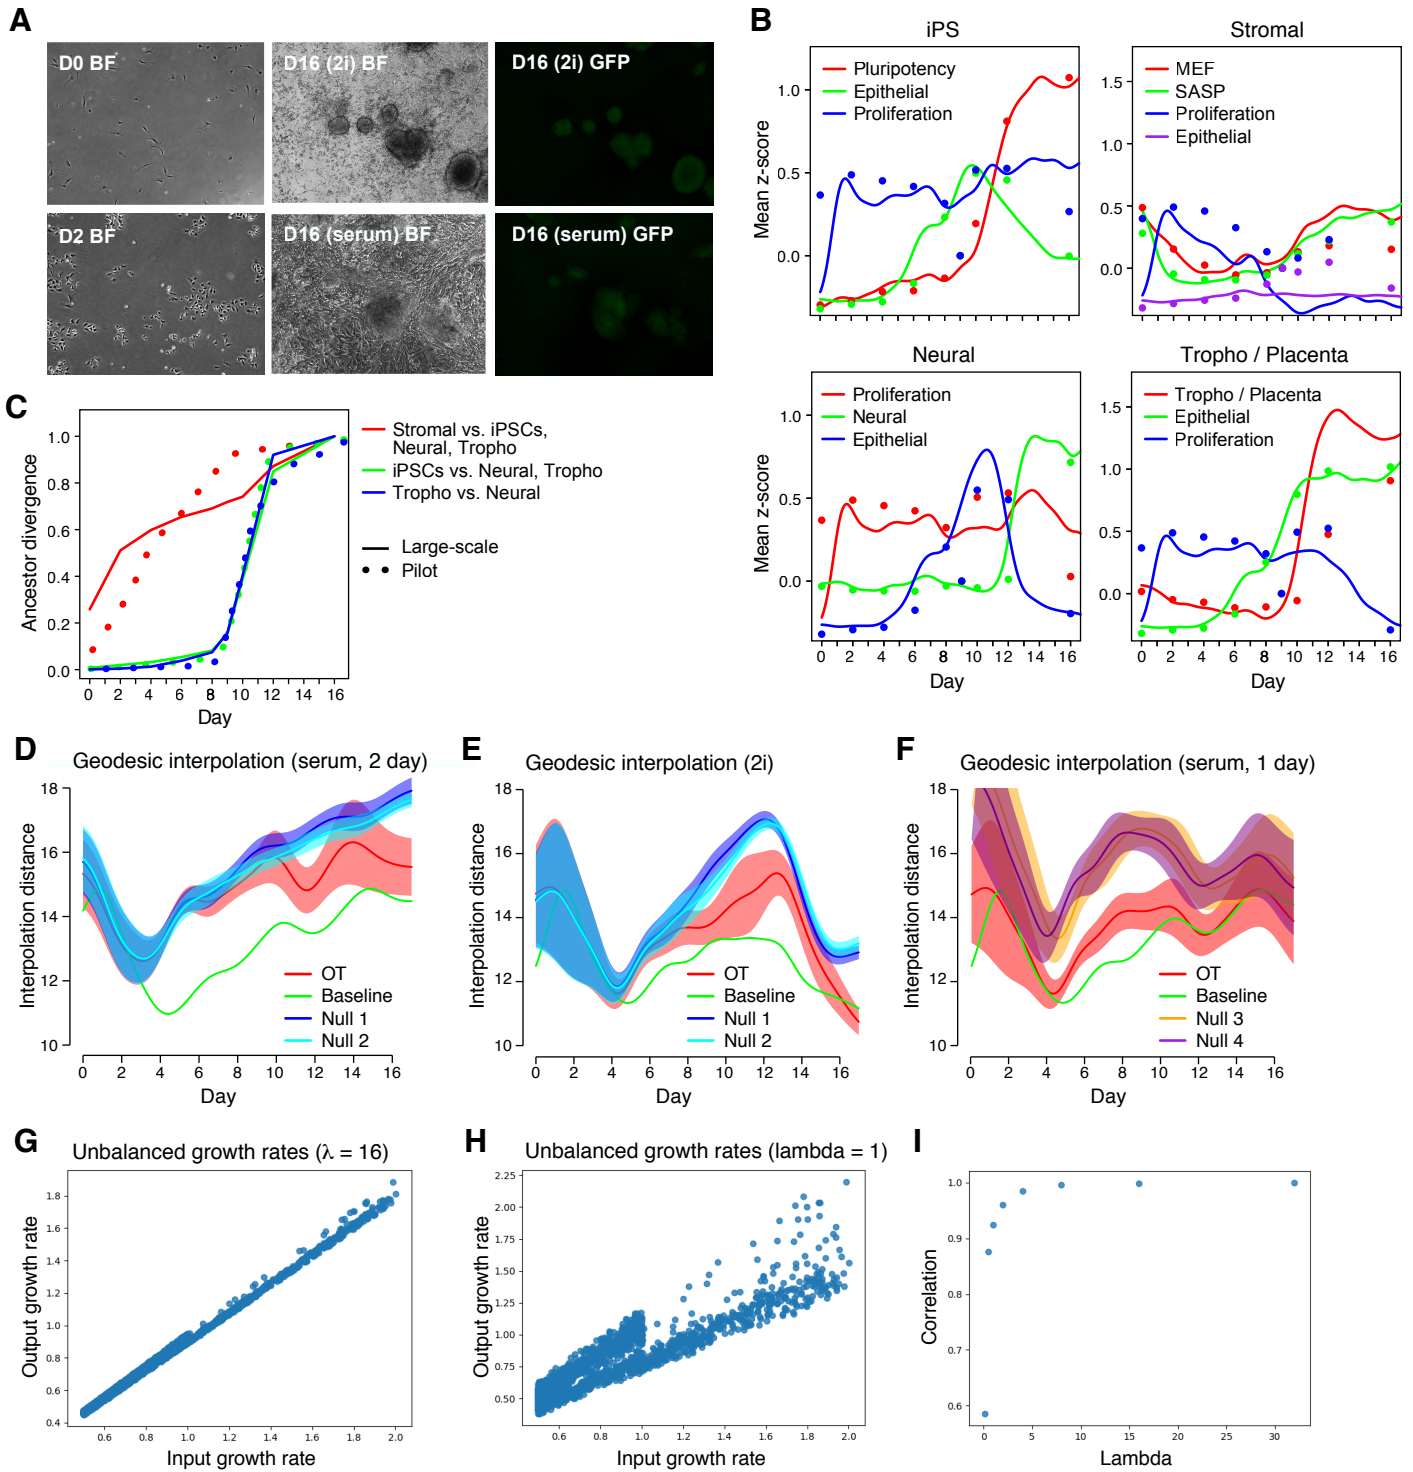

Supplement: NIHMS1519815-supplement-1.pdf [file NIHMS1519815-supplement-1.pdf]

Figure S2

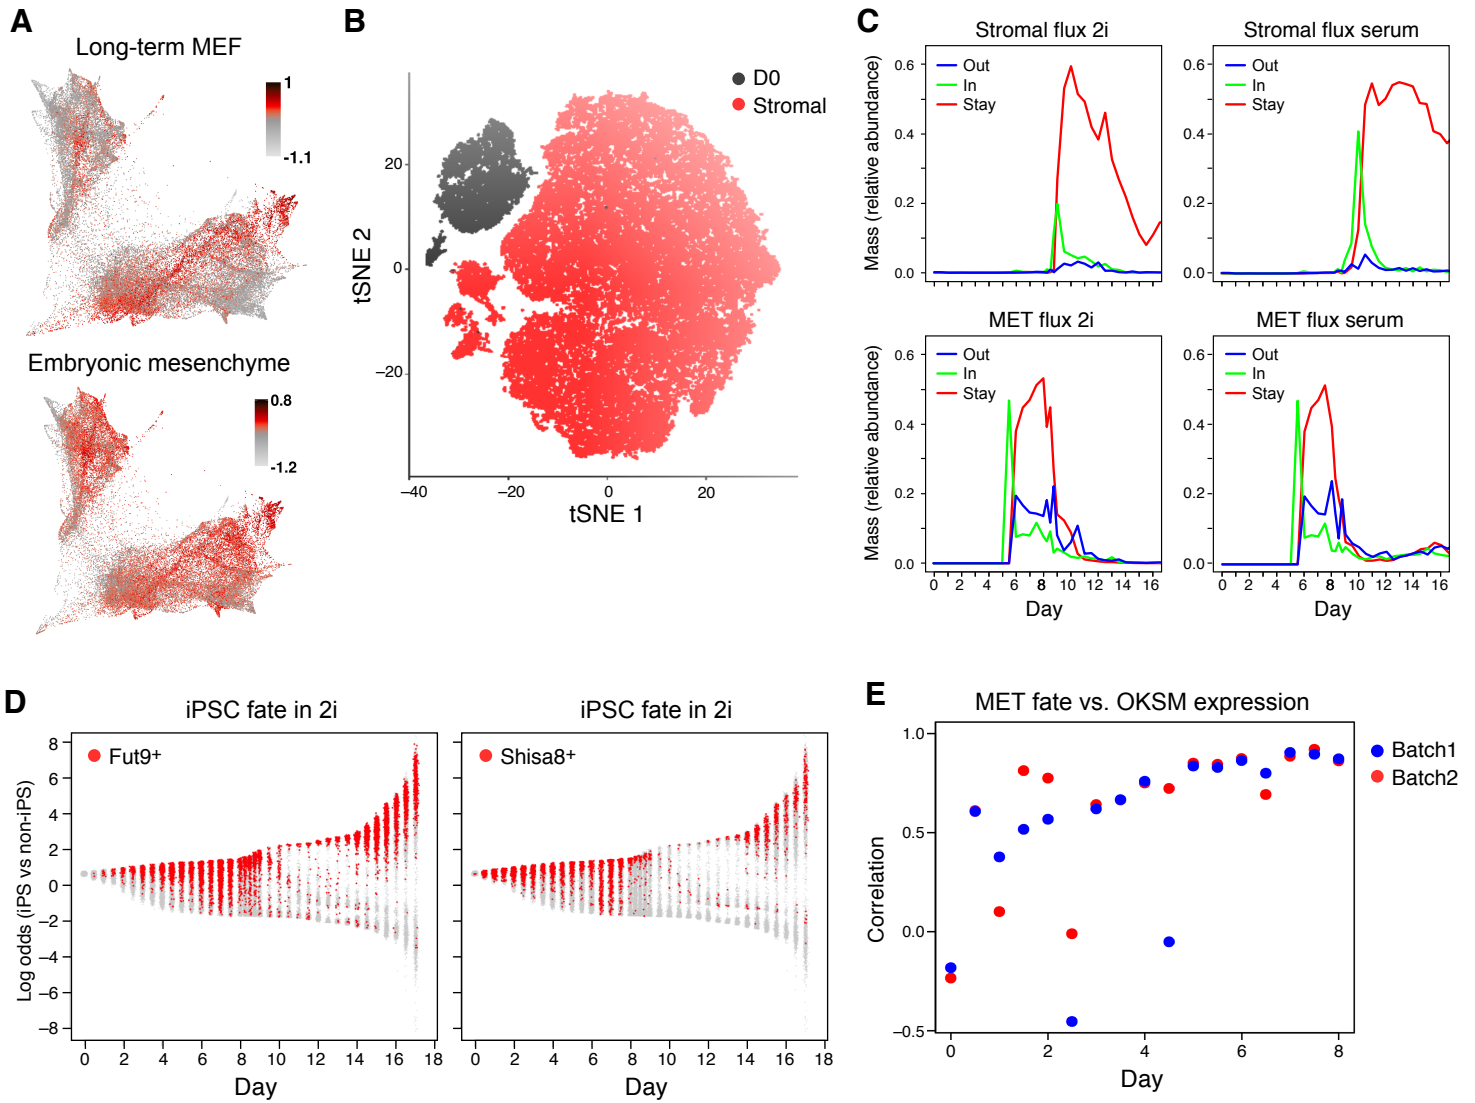

Supplement: NIHMS1519815-supplement-2.pdf [file NIHMS1519815-supplement-2.pdf]

# Figure S3

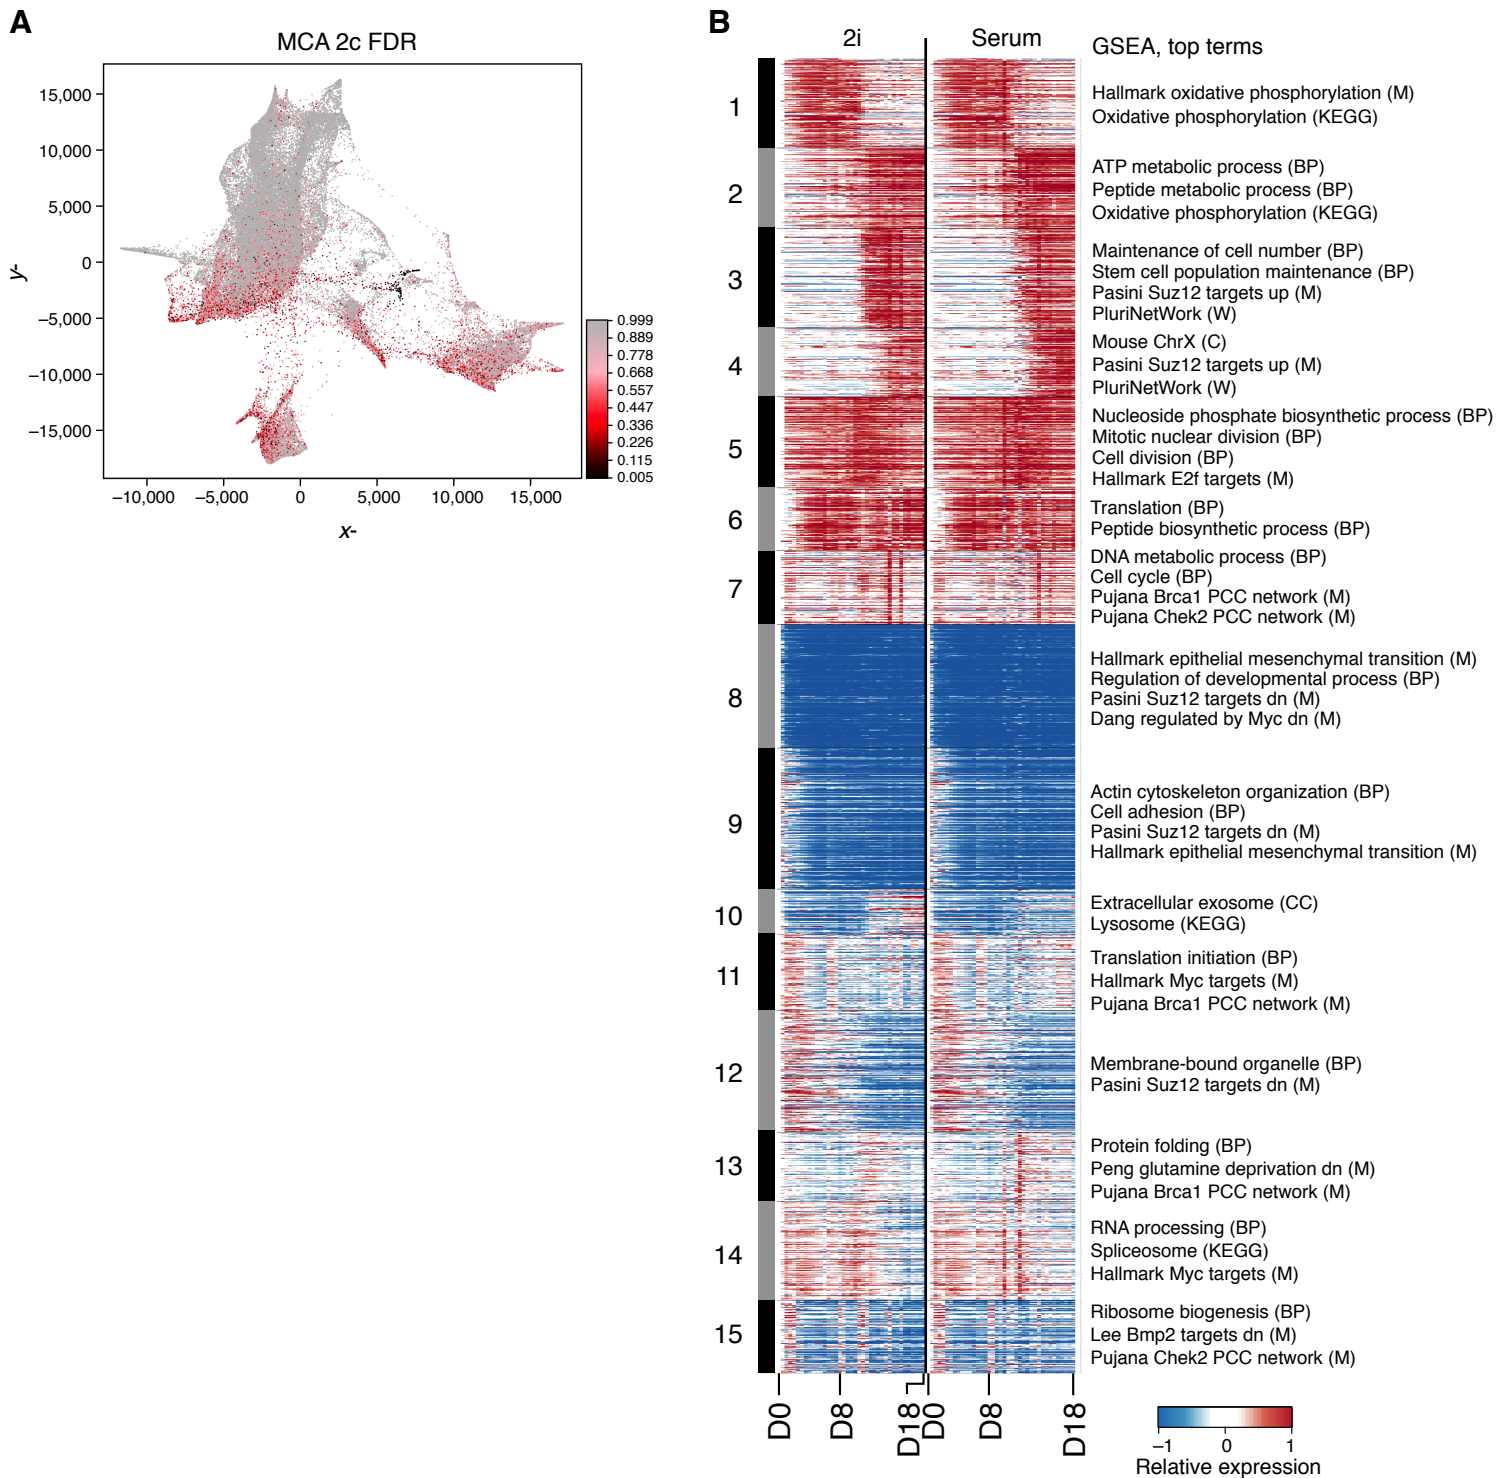

Supplement: NIHMS1519815-supplement-3.pdf [file NIHMS1519815-supplement-3.pdf]

# Figure S4

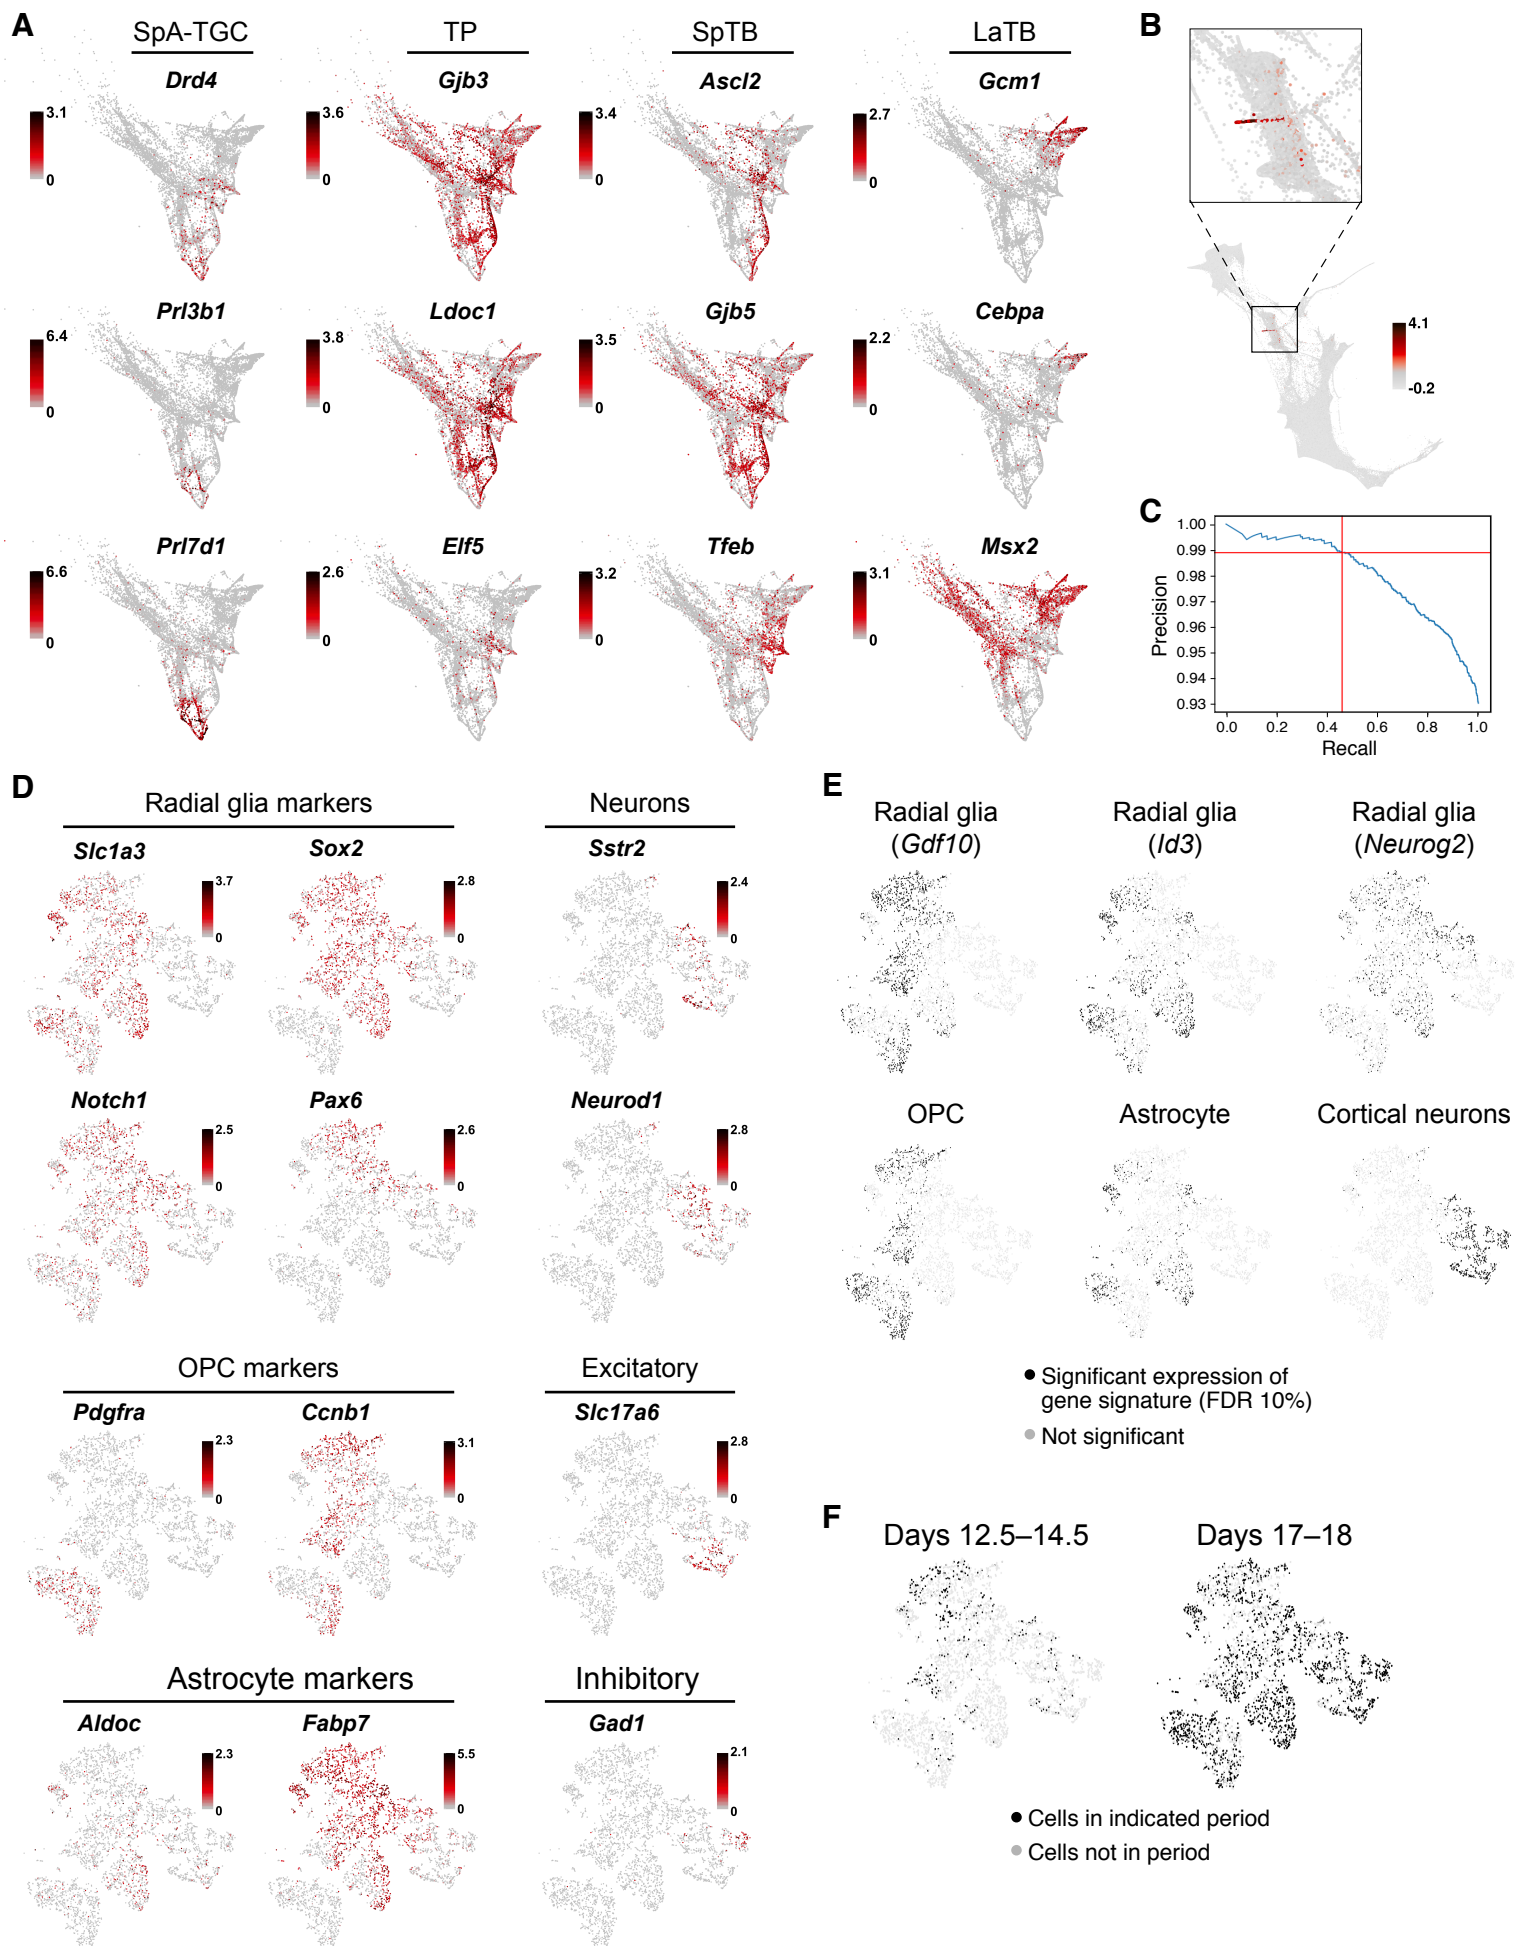

Supplement: NIHMS1519815-supplement-4.pdf [file NIHMS1519815-supplement-4.pdf]

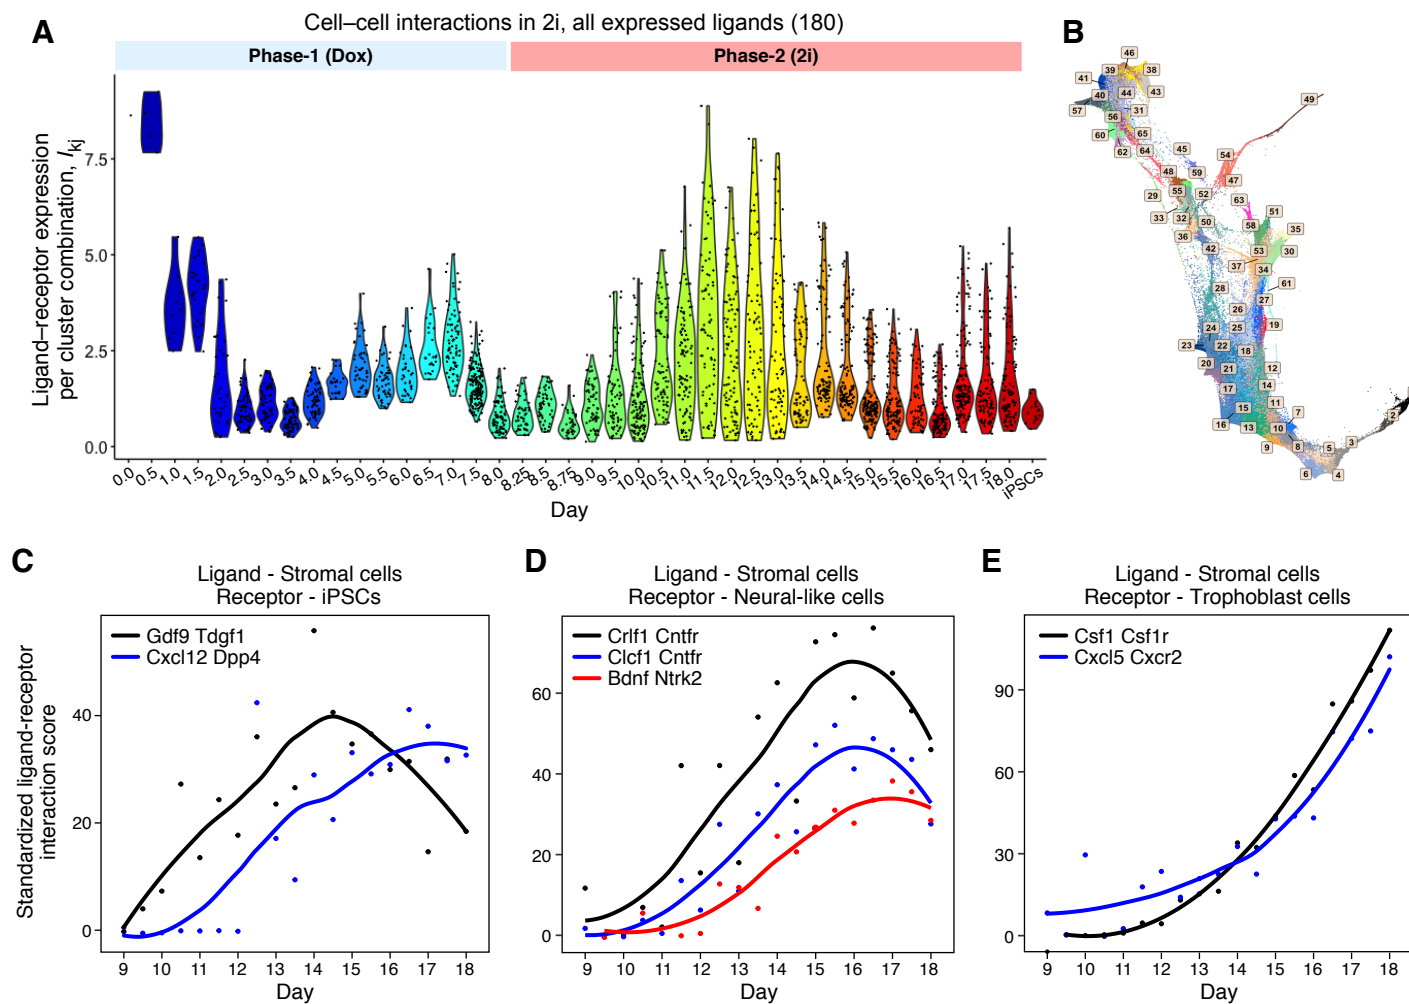

Supplement: NIHMS1519815-supplement-5.pdf [file NIHMS1519815-supplement-5.pdf]

# Figure S6

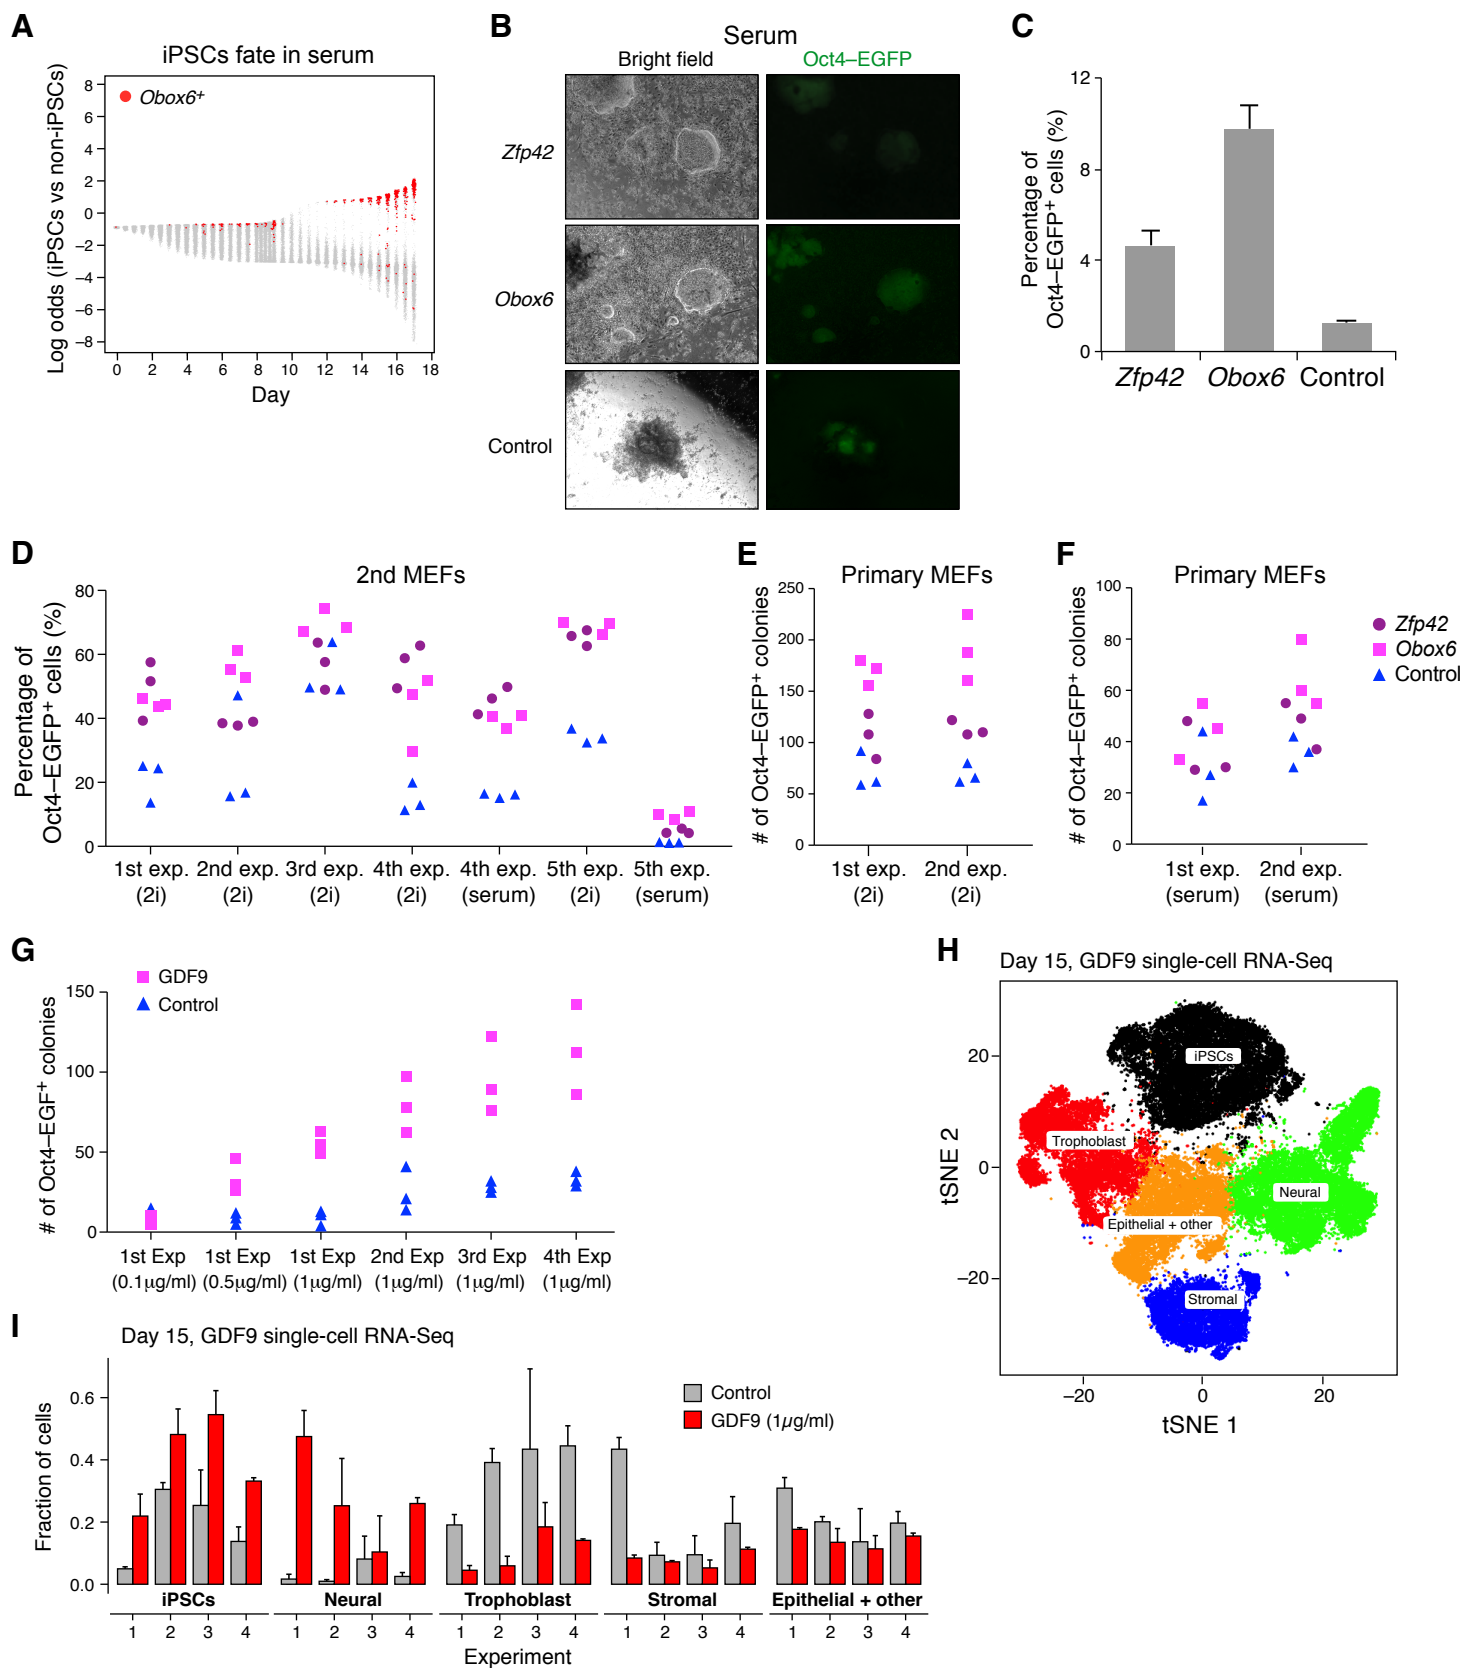

Supplement: NIHMS1519815-supplement-6.pdf [file NIHMS1519815-supplement-6.pdf]

Figure S7

**A** Monocle2

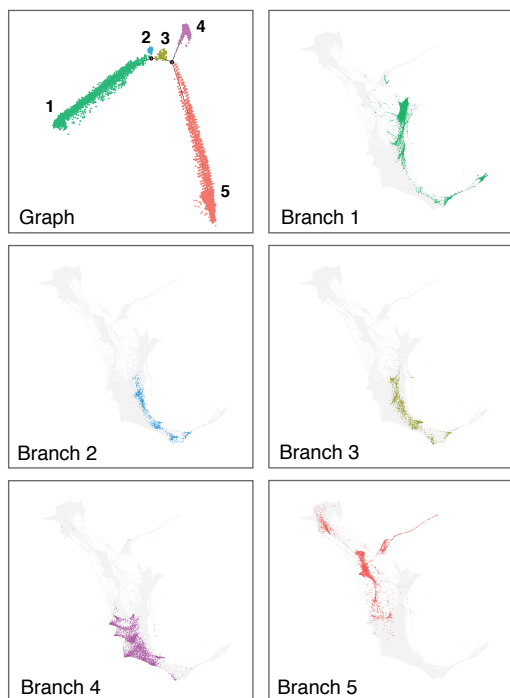

**B** URD

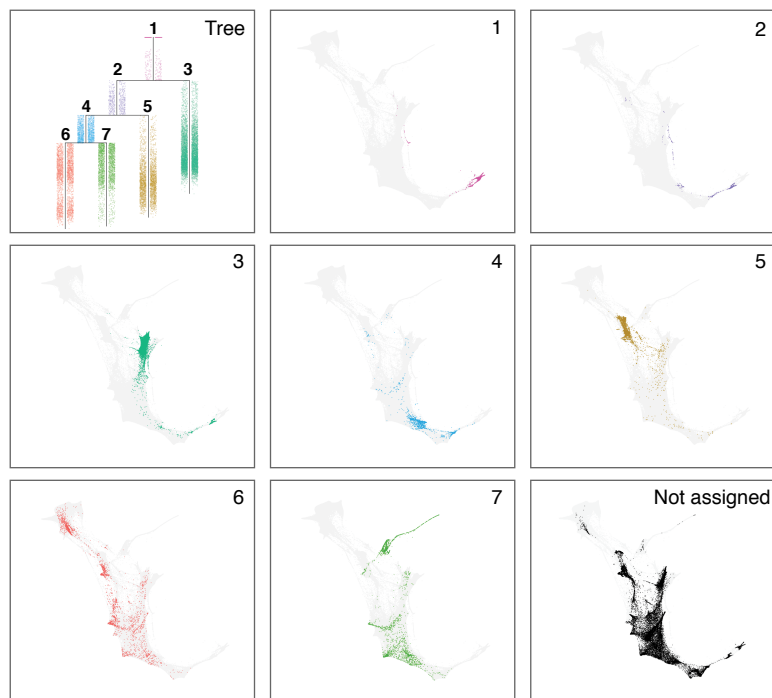

**C** Fate ID

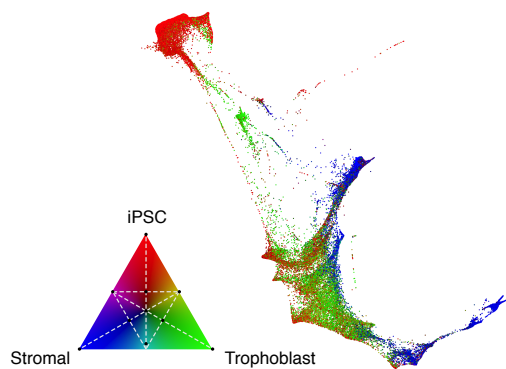

**D** AGA: Approximate Graph Abstraction

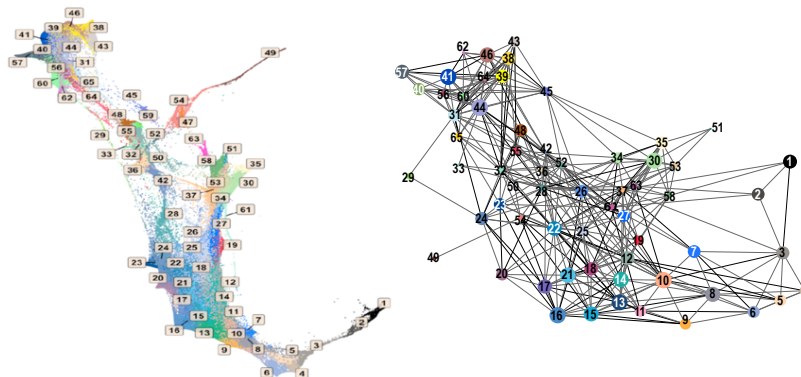

**E** STITCH

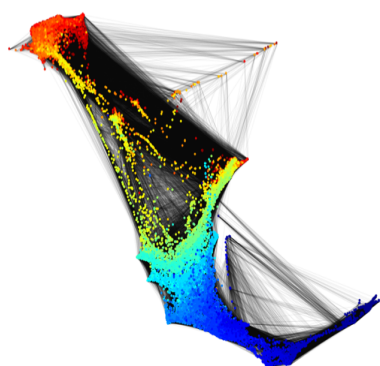

**F** GPfates

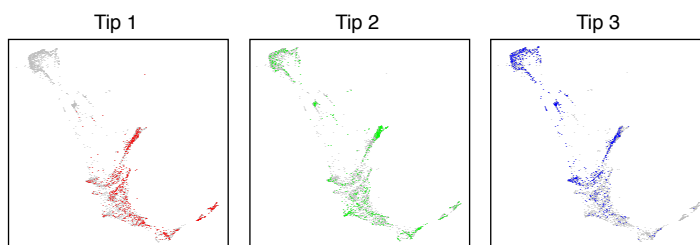

Supplement: NIHMS1519815-supplement-7.pdf [file NIHMS1519815-supplement-7.pdf]
